# Supplementary material for: Ag@Cu 2 O-MXene core–shell nanostructures: plasmonic coupling and charge transfer for ultra-sensitive SERS detection
Source: Royal Society of Chemistry journal article supplement (doi:10.1039/d5ce00769k), 2025-01-01
Supplement: d5ce00769k1.pdf [file d5ce00769k1.pdf]

## Supporting information

### **Ag@Cu<sub>2</sub>O-MXene Core-Shell Nanostructures: Plasmonic Coupling and Charge Transfer for Ultra-Sensitive SERS Detection**

Lei Chen<sup>1,2,\*</sup>, Rui Xu<sup>1</sup>, Zhi Yang<sup>2</sup>, Fuyu Chang<sup>1</sup>, Lu Yang<sup>2</sup>, Yoonseop Byun<sup>4</sup>, Eunsoo Song<sup>4</sup>, Eungyeong Park<sup>4</sup>, Lihui Liu<sup>3,\*</sup>, Young Mee Jung<sup>4,\*</sup>

<sup>1</sup>School of Materials Science and Engineering, Jilin Jianzhu University, Changchun 130118, P.R. China.

<sup>2</sup>College of Chemistry, Jilin Normal University, Siping, Jilin 136000, P.R. China.

<sup>3</sup>Institute of Chemical and Industrial Bioengineering, Jilin Engineering Normal University, Changchun 130052, P.R. China.

<sup>4</sup>Department of Chemistry, Institute for Molecular Science and Fusion Technology, and Kangwon Radiation Convergence Research Support Center, Kangwon National University, Chuncheon 24341, Korea.

\*To whom correspondence should be addressed:

[liulh999@nenu.edu.cn](mailto:liulh999@nenu.edu.cn) (L. Liu); [ymjung@kangwon.ac.kr](mailto:ymjung@kangwon.ac.kr) (Y. M. Jung)

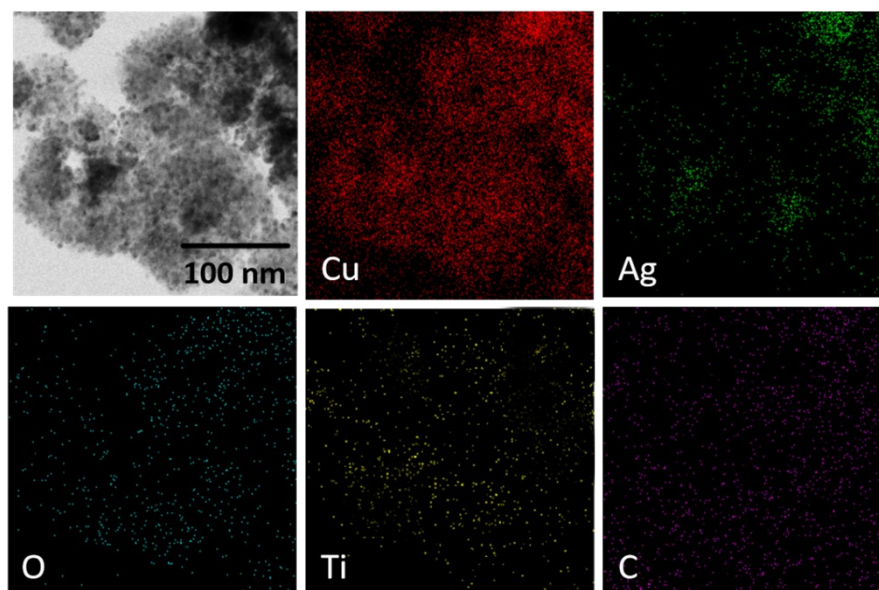

**Figure S1.** TEM image and EDS mapping of the Ag@Cu<sub>2</sub>O-MXene composites, showing the distribution of Cu, Ag, O, Ti, and C.

**Table S1.** Band assignments of the MBA adsorbed on the Ag@Cu<sub>2</sub>O-MXene composites

| Wavenumber<br>(cm <sup>-1</sup> ) | Band assignments                                                                     |
|-----------------------------------|--------------------------------------------------------------------------------------|
| 1012                              | In-plane ring breathing + $\nu$ (C–O), $b_2$                                         |
| 1075                              | In-plane ring breathing + $\nu$ (C–S), $a_1$                                         |
| 1138                              | $\nu$ (C–H), $b_2$                                                                   |
| 1183                              | $\nu$ (C–H), $a_1$                                                                   |
| 1352                              | $\beta$ (O–H) + $\nu$ (C–ph) + in-plane $\nu$ (C–C) + asymmetry $\nu$ (O–C–O), $b_2$ |
| 1582                              | In-plane $\beta$ (C–H), $a_1$                                                        |

<sup>a</sup>  $\nu$ , stretching;  $\beta$ , bending. For ring vibrations, the corresponding vibrational modes of benzene and the symmetry species under C<sub>2v</sub> symmetry are indicated.

<sup>b</sup> Wilson notation is employed.

### Calculation of enhancement factor (EF)

To evaluate the SERS activity of the Ag@Cu<sub>2</sub>O-MXene composites, the enhancement factor (EF) of MBA adsorbed on the Ag@Cu<sub>2</sub>O-MXene composites was calculated. The Raman spectra of MBA obtained under 532 and 633 nm laser excitations are shown in Figure S2. The EFs of the Ag@Cu<sub>2</sub>O-MXene composites were determined using the

following equation<sup>1</sup>:

$$EF = \frac{I_{SERS}}{I_{Bulk}} \times \frac{N_{Bulk}}{N_{SERS}}$$

where  $I_{SERS}$  represents the intensity of the SERS band at 1075 cm<sup>-1</sup>, and  $I_{Bulk}$  denotes the intensity of the Raman band at 1075 cm<sup>-1</sup> for solid MBA.

$$N_{Bulk} = A_{laser} h \rho N_A$$

Here,  $N_{Bulk}$  is the number of MBA molecules in the solid state irradiated by the laser,  $A_{laser}$  is the laser spot area (diameter = 1 μm),  $h$  is the effective focusing depth of the laser (19 μm at the excitation wavelength), and  $\rho$  is the density of MBA (1.34 g/cm<sup>3</sup>).

$$N_{SERS} = N_d A_{laser} A_N / \sigma$$

In this expression,  $N_{SERS}$  corresponds to the number of MBA molecules adsorbed on the SERS substrate within the laser spot (diameter = 1 μm),  $N_d$  is the density of Ag@Cu<sub>2</sub>O particles within the laser spot,  $A_N$  is the surface area of an individual Ag@Cu<sub>2</sub>O particle, and  $\sigma$  is the area of a single MBA molecule (0.64 nm<sup>2</sup>/molecule) adsorbed on the Ag@Cu<sub>2</sub>O-MXene composites.

### Calculation of charge transfer degree ( $\rho_{(CT)}$ )

Lombardi et al. proposed that charge transfer degree ( $\rho_{(CT)}$ ) can be used to quantitatively evaluate the CT effect<sup>2</sup>. To elucidate the underlying mechanism of Ag@Cu<sub>2</sub>O-MXene composites,  $\rho_{(CT)}$  was calculated using the following equation:

$$\rho_{(CT)} = \frac{I_{(CT)}^K - I_{(SPR)}^K}{I_{(CT)}^K + I_{(SPR)}^0}$$

Here,  $K$  represents the Raman spectrum of a single MBA molecule.  $I_{(CT)}^K$  and  $I_{(SPR)}^0$  correspond to the enhanced Raman intensities arising from CT effect and EM effect, respectively. The SERS band intensities of 1075 and 1141 cm<sup>-1</sup> were selected for the calculation of  $\rho_{(CT)}$ , corresponding to a<sub>1</sub> mode associated with C–C bond stretching vibration and b<sub>2</sub> mode associated with C–H bending, respectively.

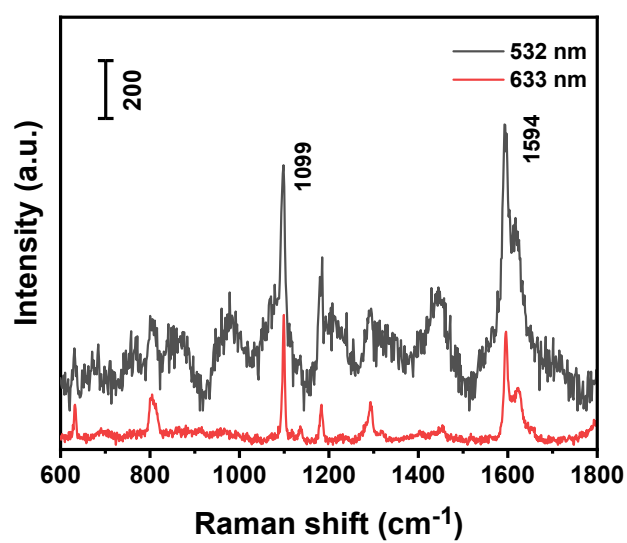

**Figure S2.** Raman spectra of MBA by using the 532 and 633 nm laser excitation.

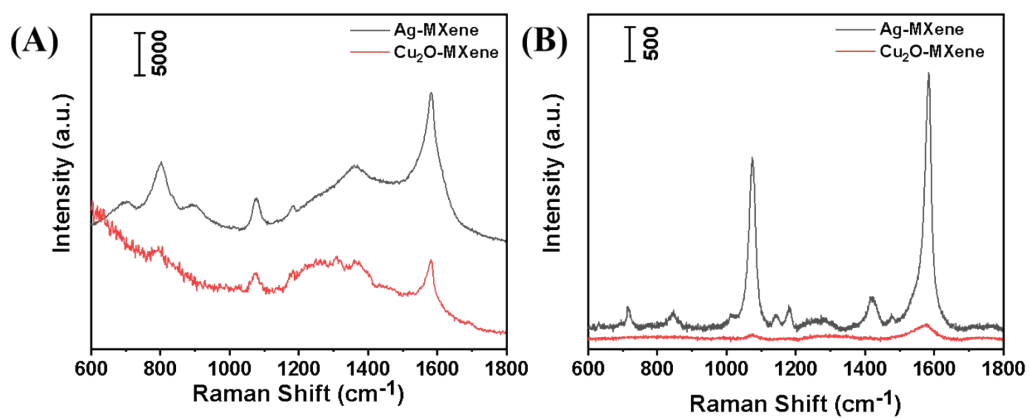

**Figure S3.** SERS spectra of MBA adsorbed on the Ag-MXene and  $\text{Cu}_2\text{O}$ -MXene substrate under (A) 532 and (B) 633 nm laser excitations.

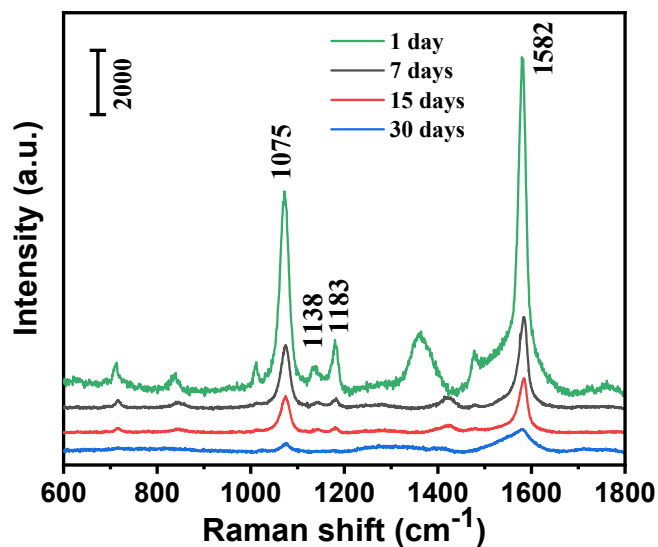

**Figure S4.** SERS spectra of MBA adsorbed on the Ag@Cu<sub>2</sub>O-MXene composites after storage for 1, 7, 15, and 30 days.

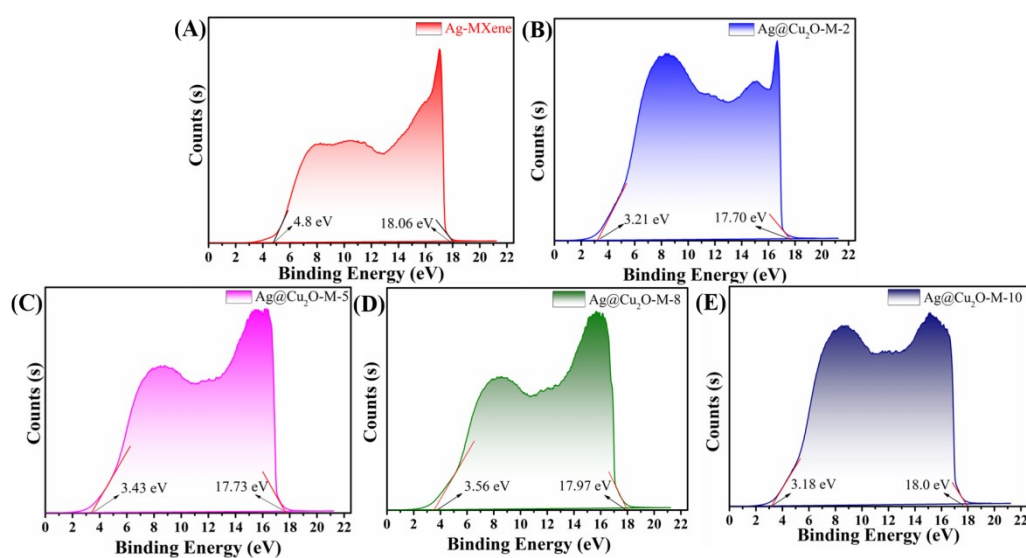

**Figure S5.** UPS spectra of (A) Ag-MXene and Ag@Cu<sub>2</sub>O-MXene composites with varying Cu(NO<sub>3</sub>)<sub>2</sub> concentrations of (B) 2, (C) 5, (D) 8, and (E) 10 mM.

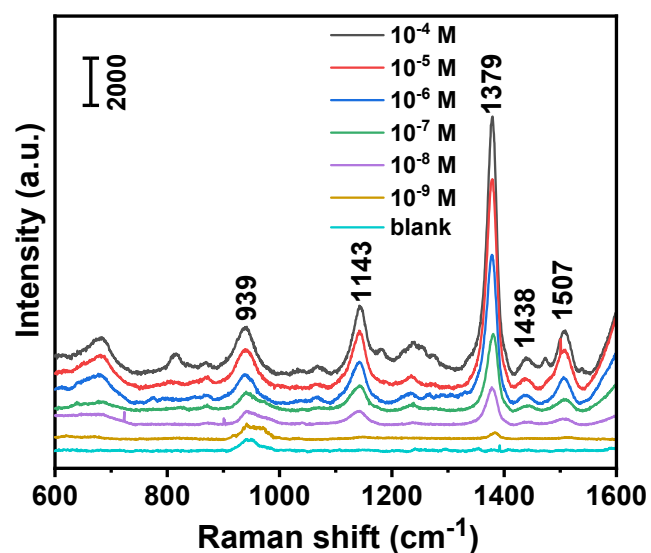

**Figure S6.** SERS spectra of Ag@Cu<sub>2</sub>O-M-8 composites adsorbed with varying concentrations of sodium dimethyl dithiocarbamate under 633 nm laser excitation.

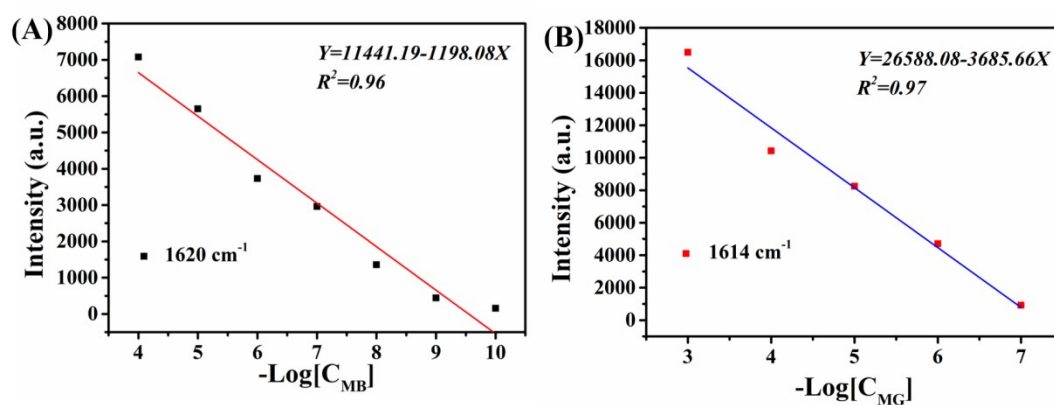

**Figure S7.** Linear correlation between logarithmic concentration and SERS intensity of the bands at (A) 1620 cm<sup>-1</sup> (MB) and (B) 1614 cm<sup>-1</sup> (MG).

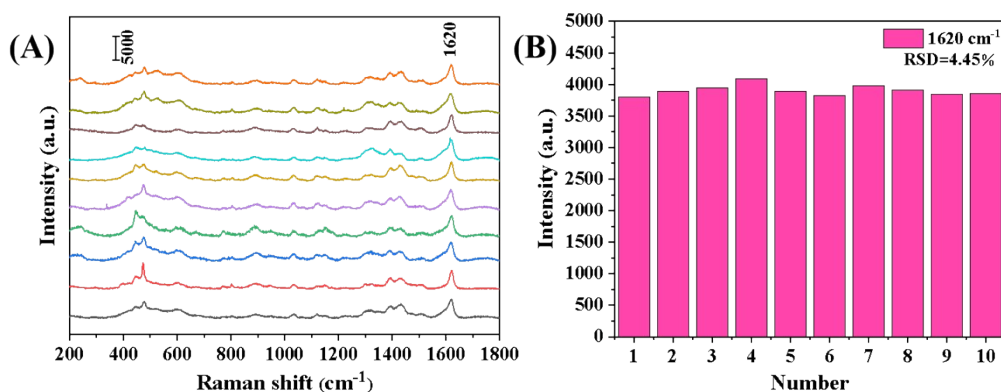

**Figure S8.** (A) SERS reproducibility of the Ag@Cu<sub>2</sub>O-M-8 substrate. SERS spectra of MB ( $1.0 \times 10^{-6}$  M) were collected from 10 randomly selected points on the composite surface. (B) Histogram of the intensity distribution for the band at 1620 cm<sup>-1</sup> across the 10 spectra.

#### References

1. X. Xue, L. Chen, C. Wang, C. Zhao, H. Wang, N. Ma, J. Li, Y. Qiao, L. Chang, B. Zhao, *Spectrochim. Acta A* 2021, **274**, 119126.
2. J. R. Lombardi, R. L. Birke, *J. Phys. Chem. C*, 2008, **112**, 5605–5617.
